# Supplementary material for: An induced pluripotent stem cell-based model identifies molecular targets of vincristine neurotoxicity
Source: Oxford University Press journal article supplement (doi:10.1242/dmm.049471), 2022-12-01
Supplement: dmm049471supp.pdf [file dmm049471supp.pdf]

**A**

| Name            | Type                           | Species | Tissue | Strain Ethnicity | Gender | Age |
|-----------------|--------------------------------|---------|--------|------------------|--------|-----|
| NTUH-iPSC-02-02 | Sendai virus reprogrammed iPSC | Human   | PBMC   | Taiwanese        | Male   | 52  |
| IBMS-iPSC-02-07 | Sendai virus reprogrammed iPSC | Human   | PBMC   | Taiwanese        | Male   | 22  |
| TVGH-iPSC-02-07 | Sendai virus reprogrammed iPSC | Human   | PBMC   | Taiwanese        | Male   | 26  |

**B**

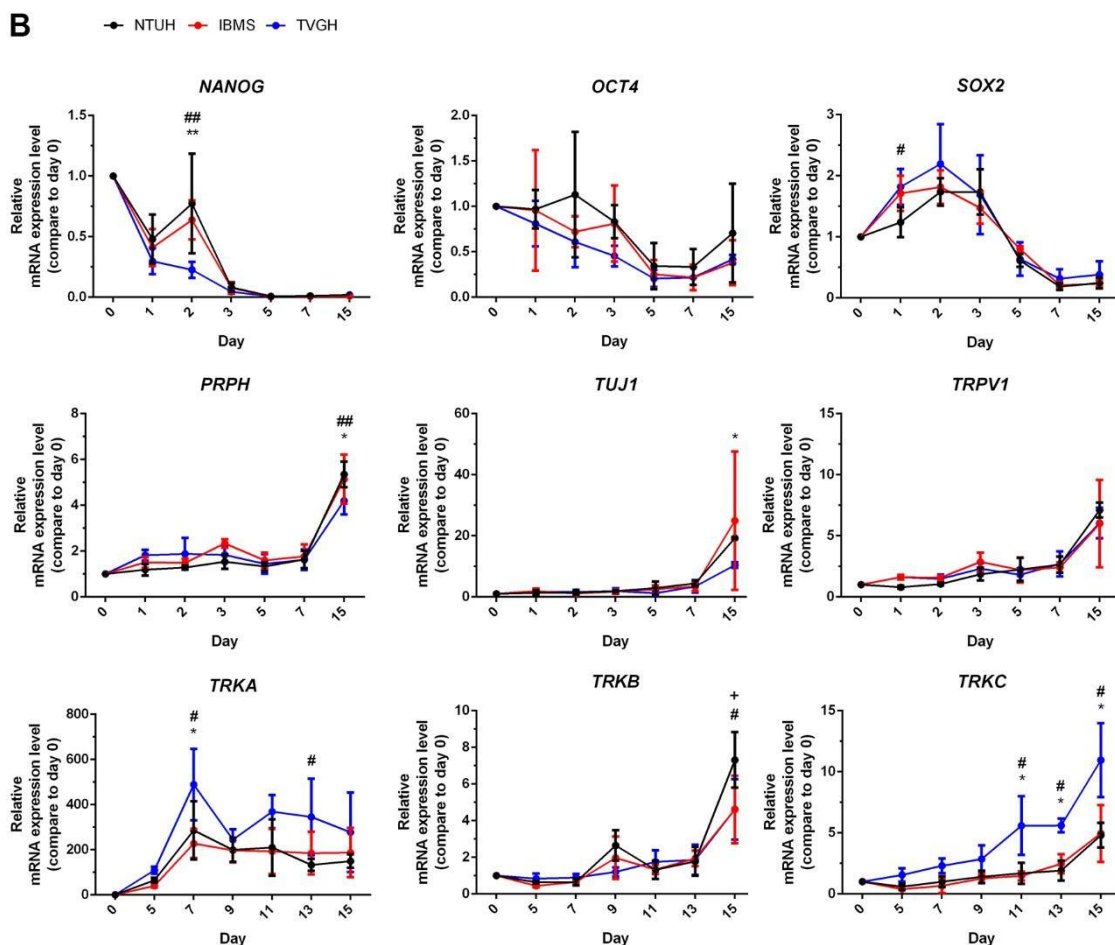

**Fig. S1. Origin and gene expression pattern during differentiation of human induced pluripotent stem cells**

There are three iPSC cell lines: NTUH, IBMS, and TVGH. They were differentiated into sensory neurons and then examined gene expressions by qPCR. (A) The information and source of iPSCs. PBMC: peripheral blood mononuclear cell. (B) The time course of gene expression during the stage of differentiation was examined with qPCR. All mRNA expression was normalized to GAPDH and shown as relative levels to that of day 0. One way ANOVA followed by Tukey's multiple comparisons test, #  $p < 0.05$ , ##  $p < 0.01$  between NTUH and IBMS; \*  $p < 0.05$ , \*\*  $p < 0.01$  between NTUH and TVGH; +  $p < 0.05$ , ++  $p < 0.01$  between IBMS and TVGH.  $n=3$ .

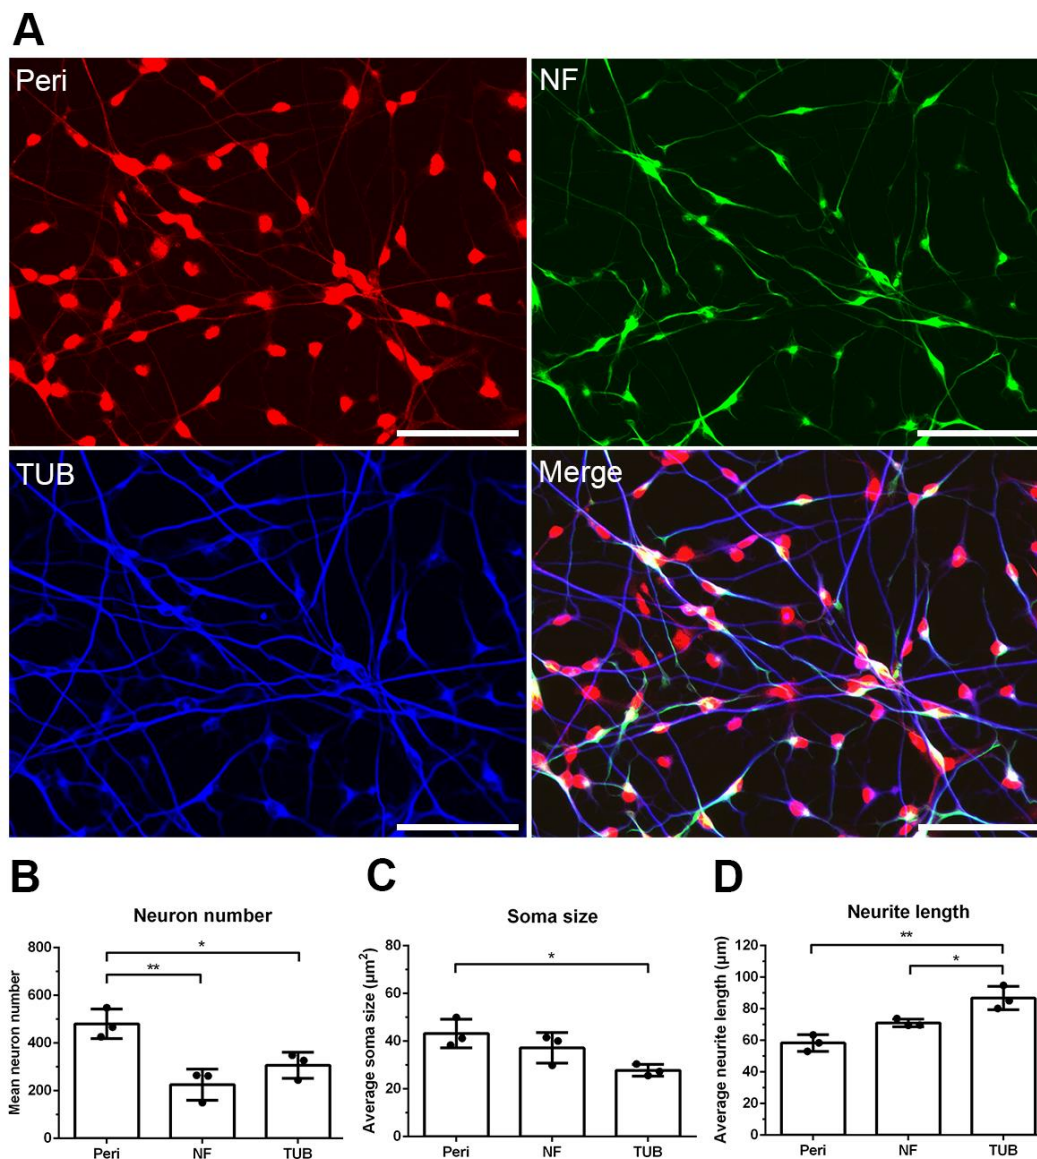

**Fig. S2. Relationship of different neuronal markers with their morphometry.**

Differentiated neurons were immunocytochemistry stained with peripherin (Peri), neurofilament heavy chain (NF), and  $\beta$ III-tubulin (TUB), then quantified with morphometry analysis. (A) There were distinct expression patterns of peripherin (Peri), neurofilament heavy chain (NF), and  $\beta$ III-tubulin (TUB). Scale bar = 20  $\mu$ m. (B-D) The quantitative analysis of neuron number, soma size, and neurite length by staining with peripherin, neurofilament, and  $\beta$ III-tubulin, indicated that neurons have different neurochemical phenotypes with compound morphometry. One way ANOVA followed by Tukey's multiple comparisons test, \*  $p < 0.05$ , \*\*  $p < 0.01$ ,  $n=3$ .

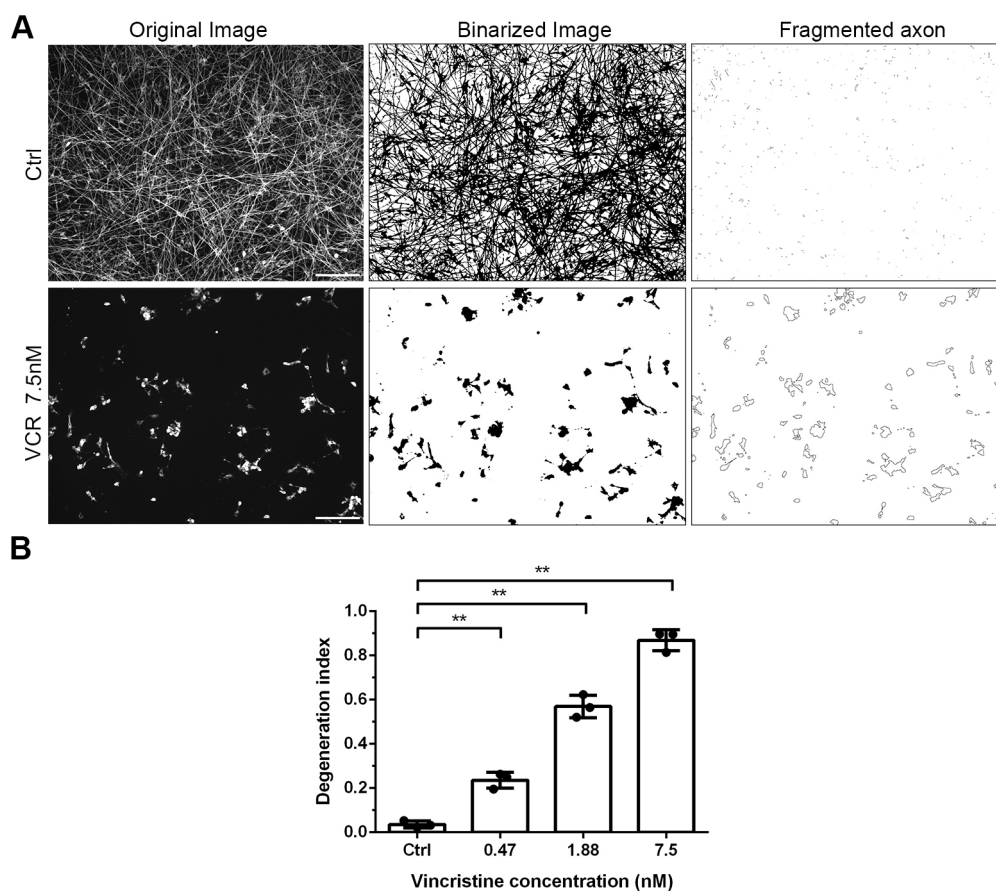

**Fig. S3. The axon degeneration index was calculated after vincristine treatment.** The area of total axons and fragmented axons was measured using ImageJ, and then the degeneration index was calculated. (A) Representative pictures of original images, binarized images, and fragmented axons from control group and 7.5 nM vincristine for 48 h. The subfigures (original images) of Ctrl and VCR 7.5 nM are reused from Fig. 4A (for quantifying neurite length and neuron number) to demonstrate the quantification of axon degeneration index. Scale bar: 20  $\mu$ m. (B) The neurons were treated with various concentrations of vincristine (0.47, 1.88, and 7.5 nM) for 48 h. The degeneration index analysis confirmed neurite injury after vincristine treatment. One way ANOVA followed by Tukey's multiple comparisons test, \*  $p < 0.05$  and \*\*  $p < 0.01$  compared to the control group,  $n=3$ .

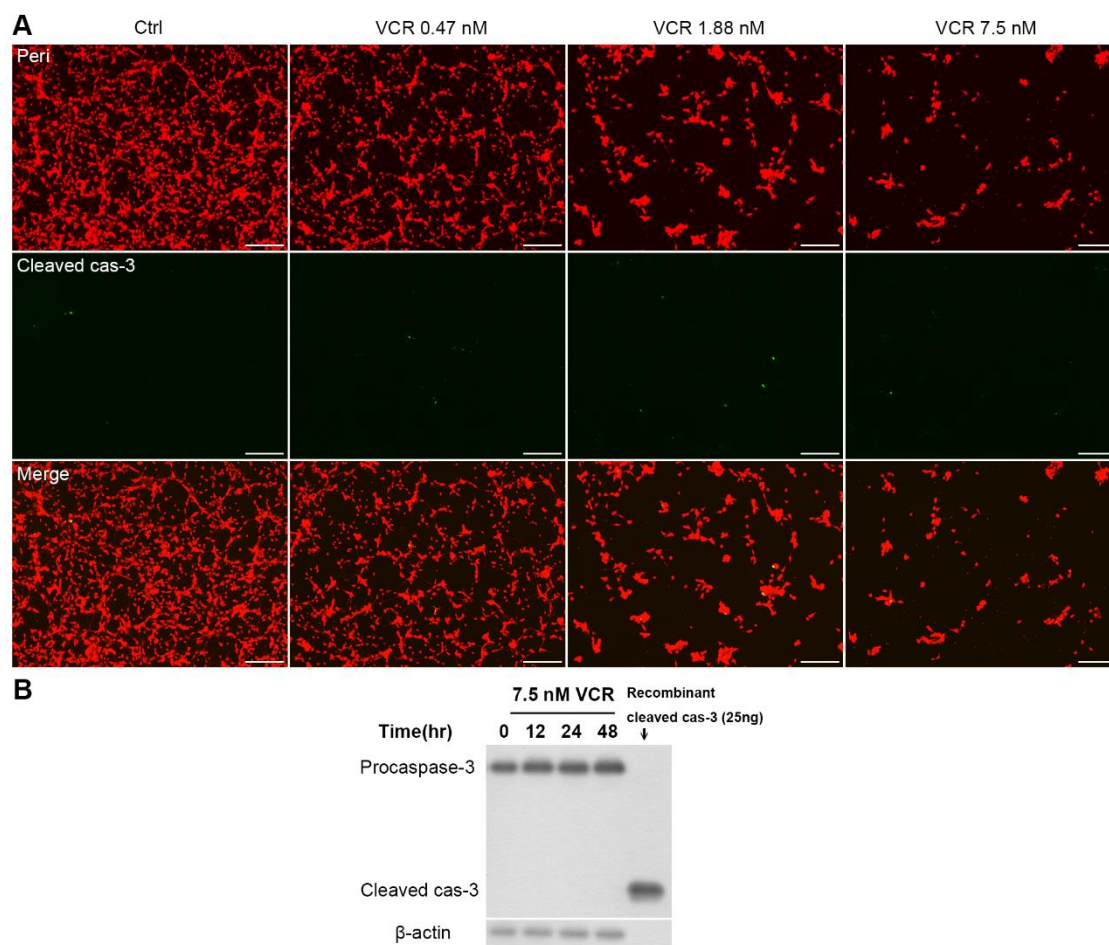

**Fig S4. The effects of apoptosis in iPSCs-derived sensory neurons after Vincristine treatment.**

iPSC-derived sensory neurons were treated with vincristine and then examined with apoptosis markers (cleaved caspase-3) by immunofluorescence staining and western blotting.

(A) Cells were stained with peripherin (red) and cleaved caspase-3 (green) after being treated with 0.47/1.88/7.5 nM vincristine for 48 h. scale bar = 20  $\mu$ m.

(B) Cells were treated with 7.5 nM vincristine for 12/24/48 h. Western blot analysis against procaspase-3 and cleaved caspase-3 after vincristine treatment was conducted. Recombinant caspase-3 protein and  $\beta$ -actin were used as positive control and internal control, respectively.

**Table S1. Primary and Secondary antibodies.**

| Antibody                                                               | Catalogue   | Host        | Dilution | Manufacturer   |
|------------------------------------------------------------------------|-------------|-------------|----------|----------------|
| <b>Immunocytochemistry</b>                                             |             |             |          |                |
| Peripherin                                                             | PER         | Chicken IgG | 1:200    | Aves           |
| $\beta$ III-tubulin                                                    | T5076       | Mouse IgG2b | 1:1000   | Sigma          |
| SMI-32<br>(Neurofilament heavy chain)                                  | SMI-32P     | Mouse IgG1  | 1:10000  | Biologend      |
| Cleaved Caspase-3 (Asp175)                                             | #9661       | Rabbit IgG  | 1:200    | Cell signaling |
| Alexa Fluor® 488<br>anti-mouse IgG<br>Fc $\gamma$ subclass 1 specific  | 155-545-205 | Goat IgG    | 1:500    | Jackson        |
| Cy <sup>TM</sup> 3<br>anti-chicken IgG (H+L)                           | 703-165-155 | Donkey IgG  | 1:500    | Jackson        |
| Alexa Fluor® 647<br>anti-mouse IgG<br>Fc $\gamma$ subclass 2b specific | 155-605-206 | Goat IgG    | 1:500    | Jackson        |
| Alexa Fluor® 488<br>anti-rabbit IgG                                    | 111-545-003 | Goat IgG    | 1:500    | Jackson        |
| <b>Western blot</b>                                                    |             |             |          |                |
| LC3                                                                    | 4108        | Rabbit IgG  | 1:1000   | Cell signaling |
| SQSTM1/p62                                                             | ab56416     | Mouse IgG   | 1:1000   | Abcam          |
| p-JNK                                                                  | 4668S       | Rabbit IgG  | 1:1000   | Cell signaling |
| JNK                                                                    | 9252        | Rabbit IgG  | 1:1000   | Cell signaling |
| p-p38                                                                  | 9211        | Rabbit IgG  | 1:1000   | Cell signaling |
| P38                                                                    | ab197348    | Rabbit IgG  | 1:1000   | Abcam          |
| p-ERK1/2                                                               | 9101        | Rabbit IgG  | 1:1000   | Cell signaling |
| ERK1/2                                                                 | 4695        | Rabbit IgG  | 1:1000   | Cell signaling |
| Caspase-3                                                              | GTX110543   | Rabbit IgG  | 1:1000   | GeneTex        |
| $\beta$ -actin                                                         | A1978       | Mouse IgG   | 1:5000   | Cell signaling |

**Table S2. Sequences of primer.**

| Gene  | Sequence(5' to 3')                                                              | Tm (°C) |
|-------|---------------------------------------------------------------------------------|---------|
| NANOG | F: AGT CCC AAA GGC AAA CAA CCC ACT TC<br>R: TGC TGG AGG CTG AGG TAT TTC TGT CTC | 62      |
| SOX2  | F: GGG AAA TGG GAG GGG TGC AAA AGA GG<br>R: TTG CGT GAG TGT GGA TGG GAT TGG TG  | 56      |
| PRPH  | F: ATG GCC GAG GCC CTC AAC CAA GAG<br>R: TAG GCG GGA CAG AGT GGC GTC GTC        | 56      |
| OCT4  | F: GAC AGG GGG AGG GGA GGA GCT AGG<br>R: CTT CCC TCC AAC CAG TTG CCC CAA AC     | 56      |
| PAX6  | F: TCT TTG CTT GGG AAA TCC G<br>R: CTG CCC GTT CAA CAT CCT TAG                  | 62      |
| TUJ1  | F: GGC CAA GGG TCA CTA CAC G<br>R: GCA GTC GCA GTT TTC ACA CTC                  | 62      |
| REX1  | F: CGC AAT CGC TTG TCC TCA GAG T<br>R: GCT CTC AAC GAA CGC TTT CCC A            | 58      |
| ASCL1 | F: TCC CCC AAC TAC TCC AAC GA<br>R: GCG ATC ACC CTG CTT CCA AA                  | 52      |
| TRPV1 | F: GGC TGT CTT CAT CAT CCT GCT GCT<br>R: GTT CTT GCT CTC CTG TGC GAT CTT GT     | 62      |
| TRKA  | F: TCT TCA CTG AGT TCC TGG AG<br>R: TTC TCC ACC GGG TCT CCA GA                  | 62      |
| TRKB  | F: AGG GCA ACC CGC CCA CGG AA<br>R: GGA TCG GTC TGG GGA AAA GG                  | 56      |
| TRKC  | F: CAC GCC AGG CCA AGG GTG AG<br>R: GAA TTC ATG ACC ACC AGC CA                  | 62      |
| RUNX1 | F: CTG CTC CGT GCT GCC TAC<br>R: AGC CAT CAC AGT GAC CAG AGT                    | 64      |
| SHOX2 | F: CAG CCA GTT TGA AGC TTG TAG AG<br>R: GAA CCT GAA AGG ACA AGG GCG T           | 56      |
| RUNX3 | F: CAG AAG CTG GAG GAC CAG AC<br>R: GTC GGA GAA TGG GTT CAG TT                  | 50      |
| CGRP  | F: TGC CCA GAA GAG AGC CT<br>R: TGA AGG TCC CTG CGG C                           | 52      |
| TAC1  | F: TTA CTG GTC CGA CTG GTA CGA C<br>R: CAA AGA ACT GCT GAG GCT TGG G            | 58      |

|     |                                                                    |    |
|-----|--------------------------------------------------------------------|----|
| RET | F: GAG GAG AGA CTA CTT GGA CCT TG<br>R: GGG GAC AGC GGT GCT AGA AT | 64 |
| NFH | F: GCC TGA GGA GAA ACC CAA GAC<br>R: TTT CAG CCT TTT CTG CCT TAG G | 64 |
